# Supplementary material
Source: Springer Nature journal article supplement (https://www.springermedizin.de/resource/supplementary/12981_2011_208_MOESM1_ESM.pdf/9604060)
Supplement: MOESM1 [file 9604060]

Questionnaire 1: N= 100

Rejected: N = 9

Accepted: N=57

No decision: N=34

New: N=2

Panel meeting

Questionnaire 2: N= 36

Prioritization: N= 86

Accepted: N=29

Rejected: N = 7

**Prioritized: N=13**

Not measurable: N=4

Applicability testing in Curaçao, Aruba and St Maarten: N= 9

**Curaçao****Aruba****St Maarten**Not feasible: N=4  
(Indicator 5, 6, 12, 13)Not feasible: N=2  
(Indicator 5 and 6)Not feasible: N=4  
(Indicator 5, 6, 12, 13)Not reliable: N=2  
(Indicator 9 and 12)Not reliable: N=3  
(Indicator 5, 12, 13)Not reliable: N=3  
(Indicator 5, 6, 11)Small Sample size: N=1  
(Indicator 6)Small Sample size: N=8  
(Indicator 6 to 13)Small Sample size: N=4  
(Indicator 5, 6, 10, 11)

Applicable set Curaçao: N= 4 (Indicator 7, 8, 10, 11)

Applicable set Aruba: N=0

Applicable set St Maarten: N=3 (Indicator 7, 8, 9)
